# Supplementary material for: An optogenetic arrhythmia model to study catecholaminergic polymorphic ventricular tachycardia mutations
Source: Springer Nature journal article supplement (doi:10.1038/s41598-017-17819-8), 2017-12-07
Supplement: MOESM1 [file 41598_2017_17819_MOESM1_ESM.pdf]

## **An optogenetic arrhythmia model to study catecholaminergic polymorphic ventricular tachycardia mutations**

Elisabeth Fischer<sup>1,2,4</sup>, Alexander Gottschalk<sup>1,2,3,\*</sup> & Christina Schüler<sup>1,2,\*</sup>

<sup>1</sup>Buchmann Institute for Molecular Life Sciences, Goethe University, Max von Laue Strasse 15, D-60438 Frankfurt, Germany

<sup>2</sup>Institute of Biophysical Chemistry, Goethe University, Max von Laue Strasse 15, D-60438 Frankfurt, Germany

<sup>3</sup>Cluster of Excellence Frankfurt – Macromolecular Complexes, Goethe University, Max von Laue Strasse 15, D-60438 Frankfurt, Germany

<sup>4</sup> Present address: University of Edinburgh, Centre for Integrative Physiology, Hugh Robson Building, George Square, Edinburgh, EH8 9XE, UK

\*to whom correspondence should be addressed: [a.gottschalk@em.uni-frankfurt.de](mailto:a.gottschalk@em.uni-frankfurt.de) & [c.schueler@em.uni-frankfurt.de](mailto:c.schueler@em.uni-frankfurt.de)

## **Supplementary Material**

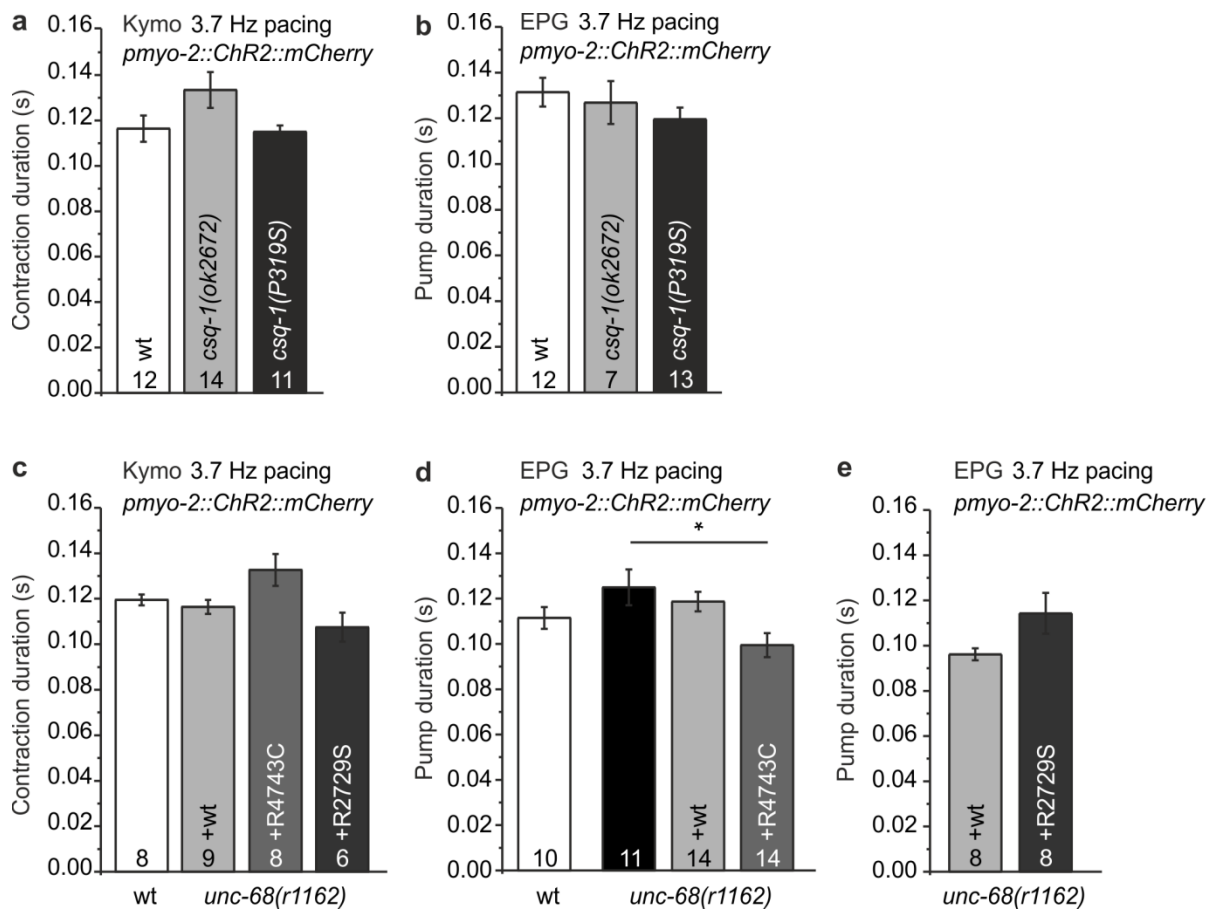

**Supplementary Figure 1 | Mutations of *unc-68* and *csq-1* do not affect pharynx pump duration.** (a) Contraction duration obtained by kymographic video analysis of intact animals and (b) pump duration obtained by EPG recordings of cut-head preparations of deletion mutant *csq-1(ok2672)*X and point mutation *csq-1(gk876502)* (altering P319 to S), compared to wt (n = 11-14, n=7-13, respectively). (c) Contraction duration obtained by kymographic video analysis and (d, e) pump duration obtained by EPG recordings of intact animals of *unc-68(r1162)* deletion mutant, its rescue with *unc-68* wt fosmid as well as the R4743C and R2729S point mutant fasmids, compared to wt (n=6-12, n=10-14, n=8, respectively).

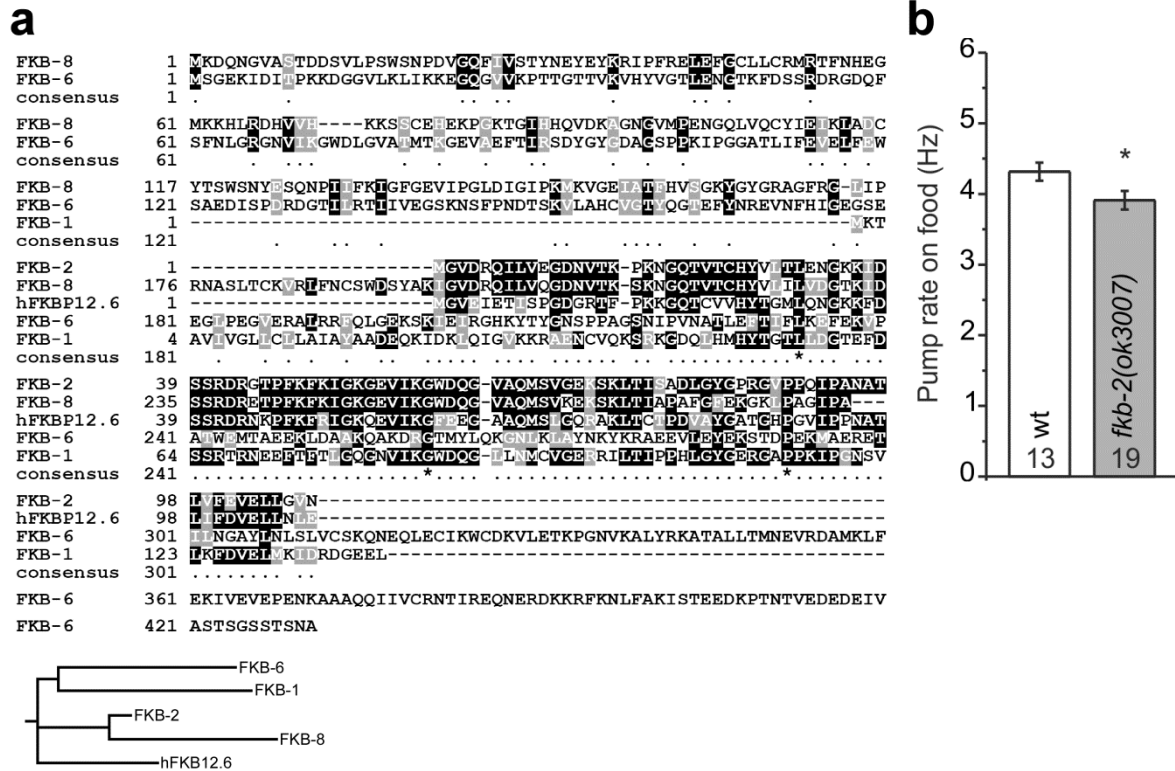

**Supplementary Figure 2 | Deletion of FKB-2, the presumptive *C. elegans* homolog of human FKBP12.6, reduces pump rate on food. (a)** Clustal-X2 alignment of *C. elegans* sequences of FKB-1, FKB-2, FKB-6 and FKB-8, with human FKBP12.6. Inset: Phylogenetic tree of the five proteins. **(b)** Food-stimulated pumping was compared in wt and *fkb-2(ok3007)* deletion mutants, by video microscopy.

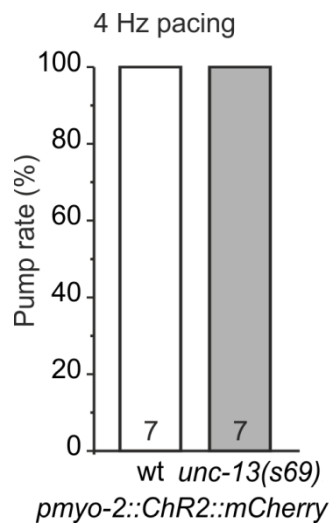

**Supplementary Figure 3 | No neuronal influence on paced pharynx pumping.** EPG recordings of cut-head preparations of *pmyo-2::ChR2::mCherry*-expressing animals containing the *unc-13(s69)* mutation compared to wt (n =7).

### Step 1

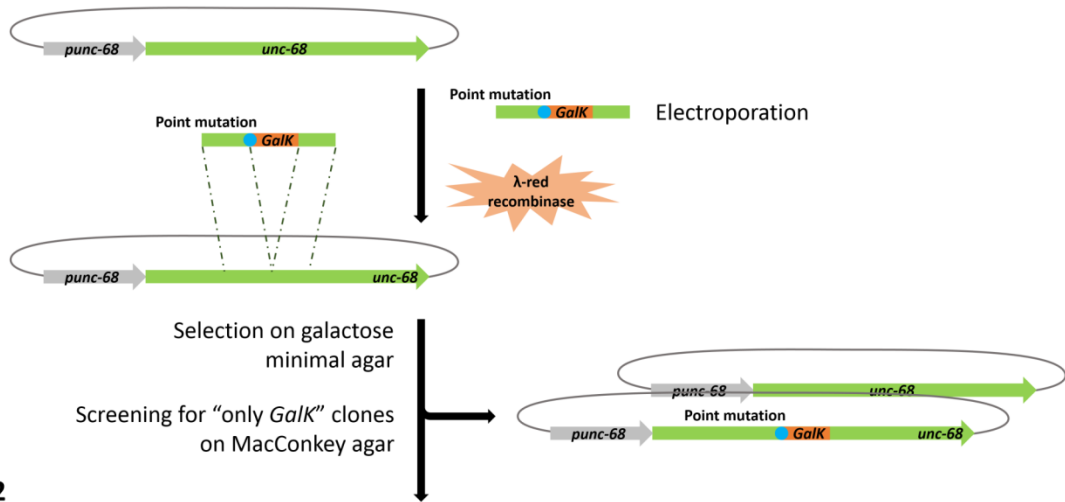

### Step 2

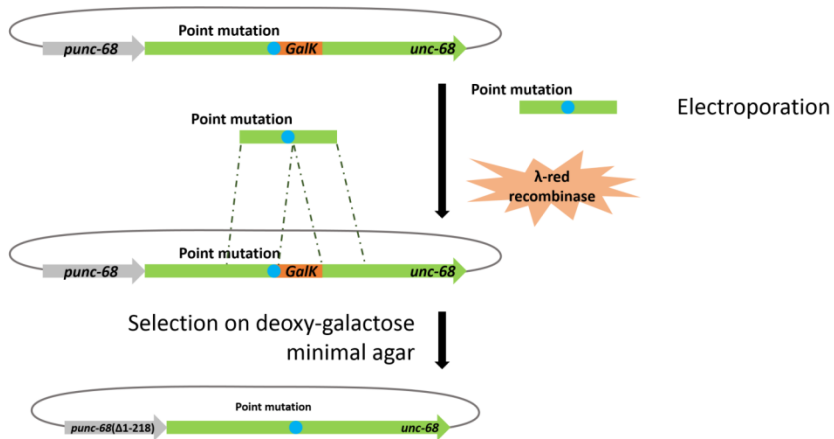

**Supplementary Figure S4 | Heterologous recombineering.** Insertion of point mutations into a fosmid containing *unc-68* by heterologous recombineering using SW105 cells, the recombinase  $\lambda$ -Red and *GalK* cassette for selection (see Methods for details).

## Supplementary Table 1: Primer sequences

### Primers for generation of plasmids used in this work:

|         |                                            |
|---------|--------------------------------------------|
| oEF48:  | 5`-GCTCGGATCCATGACTTGGATCAAACCTTGC-3`      |
| oEF49:  | 5`-GCTGGGTACCGGCAGCTCCTTTCTAGACTTCTTTCC-3` |
| oets3:  | 5`-CATCGCTGCAGGTTACAGGCATCGATTG-3`         |
| oets4:  | 5`-GTTCTTCTCGGTCAGAAC-3`                   |
| oEF150: | 5`-ATGCCTGCAGGTCGAAGCCTTCGGCGCGACTAATA-3`  |
| oEF151: | 5`-TTTTTCTACCGTACTAACAGTGTTCGACCAC-3`      |

### Primers used in this work for generation of *unc-68* point mutations in fosmids:

|         |                                                                                        |
|---------|----------------------------------------------------------------------------------------|
| oEF200: | 5`-TACCAGGCCTACTTCCAAACCATAAGGGATCAGTTTTGCTGTTCTTAGATTACCTGTTGA<br>CAATTAATCATCGG-3`   |
| oEF201: | 5`-GATTGCTCAAGAACATGGAAGAGCATATCTTGTTGATCAATCCGTATACGCGGCCGCTC<br>TAGAACTAGTGGATCC-3`  |
| oEF202: | 5`-TACAGATGTACAAAACTCAATATTTAAATATTTCCAGAATATGCTTGCATGTCCTGTTGA<br>CAATT AATCATCGG-3`  |
| oEF203: | 5`-TTGATGAAGAAAGCCAAGTACAAAGTGATCTTTTCGATTGTTTTGAAGTTGCGGCCGCTC<br>TAGAACTAGTGGATCC-3` |
| oEF15:  | 5`-CTTCATCGTCGTCTCCTTCC-3`                                                             |
| oEF16:  | 5`-GTGCACCTCAAATGGTTCAG-3`                                                             |
| oEF204: | 5`-GAAGATCCAGCCGATTCAAC-3`                                                             |
| oEF205: | 5`-TTGAGCGCAAGAGCTGTATC-3`                                                             |
| oEF206: | 5`-AAGATCCAGCCGATTCAACC-3`                                                             |
| oEF207: | 5`-CAATCCGTATACTGAATCTAAGAACAGC-3`                                                     |
| oEF208: | 5`-GCTGTTCTTAGATTCAAGTATACGGAATTG-3`                                                   |
| oEF209: | 5`-CGTCGGCAAAGAAGTGTGAG-3`                                                             |
| oEF210: | 5`-GAATCTATCGGTGCACCTC-3`                                                              |
| oEF211: | 5`-CCAGAATATGCTTGCATGTAACCTCAAACAATCG-3`                                               |
| oEF212: | 5`-CGATTGTTTTGAAGTTACATGCAAGCATATTCTGG-3`                                              |
| oEF213: | 5`-CCTCCGATGCAGCTTCAGC-3`                                                              |

Primers used in this work for genotyping of mutants:

oEF59: 5`-CTCAGCGGTGGAAAC-3`  
oEF60: 5`-GTACTTGAACCTAGGTAC-3`  
oEF61: 5`-GTGTACTCTGTTTCGTC-3`  
oNH1: 5`-TGCGCAGACCATTTGAGGAAG-3`  
oNH2: 5`-CTCCCTCACGGGTTTCCTC-3`  
oNH3: 5`-GAAACTACCAAGCGGCAACC-3`  
oEF214: 5`-TGCGCAGACCATTTGAGGAA-3`  
oEF215: 5`-GAAGGACCTCAAATCGGACT-3`
